# Supplementary material for: Genome Wide Association Mapping of Grain Arsenic, Copper, Molybdenum and Zinc in Rice (Oryza sativa L.) Grown at Four International Field Sites
Source: PLoS One. 2014 Feb 25;9(2):e89685. doi: 10.1371/journal.pone.0089685 (PMC3934919; doi:10.1371/journal.pone.0089685)
Supplement: Table S5 — List of significant SNPs associated with the accumulation of molybdenum within rice grains. (XLSX) [file pone.0089685.s006.xlsx]

## Sheet: Sheet1
Field site	Marker	Chromosome	BP	P-value	-Log(P)	Association detected in	major allele	minor allele	Number of major alleles	Number of minor alleles	MAF(%)
Texas	id1009239	1	14030108	7.84565e-05	4.10537	ALL	T	A	216	84	28
Texas	id1009435	1	14357918	2.1442e-07	6.66873	AUS	C	A	37	2	5.13
Arkansas2006	id1011077	1	18400420	7.02082e-05	4.15361	TRJ	G	C	53	19	26.39
Texas	id1011758	1	20284134	8.37705e-05	4.07691	AUS	A	C	51	3	5.56
Texas	wd1001621	1	21548357	5.58823e-05	4.25273	AUS	A	C	34	3	8.11
Arkansas2007	id1013613	1	23632442	1.10813e-05	4.95541	TEJ	T	C	58	9	13.43
Arkansas2007	id1013726	1	23716753	8.17674e-05	4.08742	AUS	G	A	24	2	7.69
Texas	id1014908	1	24986253	1.83008e-05	4.73753	ALL	C	T	213	89	29.47
Texas	id1015291	1	25768623	1.55559e-05	4.8081	ALL	G	A	210	90	30
Texas	id1015292	1	25786055	3.23403e-05	4.49026	ALL	C	T	197	90	31.36
Texas	wd1001725	1	25880733	9.77435e-06	5.00991	ALL	G	A	204	95	31.77
Texas	id1015306	1	25922460	5.34144e-05	4.27234	ALL	C	A	211	91	30.13
Texas	id1015327	1	26002852	9.80941e-05	4.00836	ALL	A	G	192	106	35.57
Texas	id1015355	1	26072369	5.34144e-05	4.27234	ALL	A	G	211	91	30.13
Arkansas2007	id1016414	1	28114171	9.40973e-05	4.02642	ALL	C	T	204	71	25.82
Faridpur	id1020807	1	33365129	6.74248e-05	4.17118	ALL	G	A	177	73	29.2
Texas	id1025955	1	40762908	3.11671e-06	5.5063	AUS	C	G	52	3	5.45
Texas	id1026392	1	41142496	3.46536e-05	4.46025	AUS	C	A	49	5	9.26
Texas	id1026537	1	41190960	7.29304e-06	5.13709	AUS	T	G	50	4	7.41
Texas	id1027709	1	42435364	7.59572e-05	4.11943	AUS	T	C	52	3	5.45
Texas	id1027715	1	42438398	7.59572e-05	4.11943	AUS	C	T	52	3	5.45
Texas	id1027765	1	42551513	1.77687e-05	4.75034	AUS	T	C	48	4	7.69
Texas	dd1002102	1	42553041	5.00868e-05	4.30028	AUS	C	G	32	3	8.57
Arkansas2006	id2000530	2	651557	1.73307e-05	4.76118	IND	A	C	51	4	7.27
Qiyang	id2000611	2	784256	9.90422e-05	4.00418	TRJ	C	G	71	6	7.79
Faridpur	id2006588	2	16437491	1.47665e-05	4.83072	ALL	T	C	175	72	29.15
Faridpur	id2006741	2	16831652	7.7748e-05	4.10931	ALL	A	C	180	68	27.42
Texas	id2007468	2	18813791	6.01893e-06	5.22048	TRJ	A	G	78	5	6.02
Texas	id2010014	2	24064039	3.14078e-05	4.50296	AUS	C	T	13	9	40.91
Arkansas2006	id2012831	2	29288192	3.92114e-05	4.40659	IND	A	T	39	5	11.36
Qiyang	id2012831	2	29288192	7.01989e-06	5.15367	IND	A	T	38	3	7.32
Faridpur	id2016247	2	35371127	2.04981e-06	5.68829	IND	C	A	34	2	5.56
Qiyang	id3001101	3	2010899	2.47086e-05	4.60715	IND	G	A	37	2	5.13
Faridpur	id3002844	3	4787773	2.691e-05	4.57009	ALL	T	C	198	37	15.74
Faridpur	id3002905	3	4870581	4.91706e-05	4.30829	ALL	G	A	147	102	40.96
Arkansas2006	id3002956	3	4941345	4.68749e-05	4.32906	ALL	A	G	167	104	38.38
Faridpur	id3002956	3	4941345	1.96836e-06	5.7059	ALL	A	G	152	100	39.68
Arkansas2006	id3002990	3	4998786	2.60932e-05	4.58347	ALL	G	A	163	97	37.31
Arkansas2006	id3002990	3	4998786	7.30105e-05	4.13661	TEJ	G	A	52	23	30.67
Faridpur	id3002990	3	4998786	2.40589e-06	5.61872	ALL	G	A	148	95	39.09
Faridpur	id3002993	3	5001998	3.08816e-05	4.5103	ALL	C	A	150	100	40
Faridpur	id3003001	3	5017191	1.53639e-06	5.8135	ALL	G	T	204	48	19.05
Faridpur	id3003034	3	5111320	3.29237e-05	4.48249	ALL	A	C	209	43	17.06
Faridpur	id3003219	3	5481084	5.15375e-05	4.28788	ALL	G	T	208	40	16.13
Faridpur	id3004262	3	7919139	6.11652e-06	5.2135	ALL	G	A	204	46	18.4
Faridpur	id3004262	3	7919139	9.28736e-05	4.03211	TEJ	A	G	45	23	33.82
Faridpur	id3004359	3	8217518	6.6426e-05	4.17766	ALL	G	A	191	59	23.6
Texas	id3007318	3	14600340	6.26658e-06	5.20297	IND	G	A	65	4	5.8
Arkansas2006	id3008680	3	17801211	2.07014e-05	4.684	ALL	G	A	248	24	8.82
Arkansas2007	id3010581	3	23067138	9.0099e-05	4.04528	IND	C	T	56	5	8.2
Texas	id3010850	3	24425829	5.9973e-06	5.22204	AUS	A	T	50	3	5.66
Texas	id3010870	3	24492231	3.11671e-06	5.5063	AUS	C	T	52	3	5.45
Faridpur	id3011962	3	27606606	5.96842e-05	4.22414	IND	T	G	26	2	7.14
Faridpur	id3011965	3	27607191	5.96842e-05	4.22414	IND	A	G	26	2	7.14
Faridpur	id3011967	3	27607478	5.96842e-05	4.22414	IND	A	G	26	2	7.14
Arkansas2006	dd3000293	3	27614357	2.42767e-05	4.61481	ALL	A	G	209	31	12.92
Arkansas2006	id3012036	3	27633146	9.50186e-05	4.02219	ALL	T	G	215	57	20.96
Arkansas2006	dd3000580	3	27670835	7.72025e-05	4.11237	ALL	A	G	210	50	19.23
Arkansas2006	id3012161	3	27673971	6.86231e-05	4.16353	ALL	T	A	210	53	20.15
Arkansas2006	id3012219	3	27697824	2.45277e-05	4.61034	ALL	G	A	217	32	12.85
Arkansas2006	id3012601	3	27905510	9.85226e-05	4.00646	ALL	G	A	220	50	18.52
Arkansas2006	id3012683	3	27977528	6.02671e-05	4.21992	ALL	T	C	215	39	15.35
Arkansas2006	id3013000	3	28106372	4.02978e-06	5.39472	ALL	G	A	206	56	21.37
Arkansas2006	id3013065	3	28117376	4.51075e-06	5.34575	ALL	C	T	215	57	20.96
Faridpur	id3013369	3	28600804	6.30565e-05	4.20027	IND	G	A	50	3	5.66
Faridpur	id3013399	3	28623374	6.30565e-05	4.20027	IND	C	T	50	3	5.66
Faridpur	id3013480	3	28769753	6.30565e-05	4.20027	IND	T	C	50	3	5.66
Arkansas2006	id3013491	3	28782337	7.07869e-05	4.15005	IND	G	A	36	2	5.26
Faridpur	id3013491	3	28782337	9.93256e-05	4.00294	IND	G	A	34	3	8.11
Faridpur	id3013579	3	28991889	6.30565e-05	4.20027	IND	C	G	50	3	5.66
Faridpur	id3013601	3	29041965	6.30565e-05	4.20027	IND	A	T	50	3	5.66
Faridpur	id3013617	3	29063669	6.30565e-05	4.20027	IND	G	A	50	3	5.66
Faridpur	id3013620	3	29066110	6.30565e-05	4.20027	IND	C	G	50	3	5.66
Faridpur	id3013655	3	29086765	6.30565e-05	4.20027	IND	G	T	50	3	5.66
Faridpur	ud3001600	3	29087997	6.30565e-05	4.20027	IND	A	T	50	3	5.66
Faridpur	id3013662	3	29110302	6.30565e-05	4.20027	IND	C	G	50	3	5.66
Faridpur	id3013693	3	29154953	6.30565e-05	4.20027	IND	A	C	50	3	5.66
Faridpur	id3013712	3	29176911	6.30565e-05	4.20027	IND	C	T	50	3	5.66
Qiyang	id3013811	3	29309882	6.88303e-06	5.16222	ALL	C	T	184	53	22.36
Qiyang	id3013878	3	29502901	6.88303e-06	5.16222	ALL	A	C	184	53	22.36
Arkansas2007	id3016683	3	34117677	2.69481e-05	4.56947	IND	C	A	55	6	9.84
Arkansas2007	id3016688	3	34123650	2.69257e-05	4.56983	IND	G	A	53	6	10.17
Arkansas2007	id3016689	3	34161626	4.38646e-05	4.35789	IND	A	G	55	5	8.33
Arkansas2007	id3016691	3	34162853	4.38646e-05	4.35789	IND	T	C	55	5	8.33
Qiyang	id4000232	4	458978	7.94781e-05	4.09975	IND	C	A	41	3	6.82
Arkansas2006	id4002250	4	5299461	7.3984e-07	6.13086	IND	G	C	53	3	5.36
Texas	id4006442	4	20393645	9.83321e-05	4.0073	ALL	A	G	179	123	40.73
Qiyang	id4010058	4	29929439	8.76166e-05	4.05741	IND	C	T	43	3	6.52
Arkansas2006	id4010426	4	30691462	8.39804e-05	4.07582	ALL	A	G	228	44	16.18
Faridpur	id4010426	4	30691462	1.30196e-06	5.8854	ALL	A	G	212	40	15.87
Arkansas2007	id4010793	4	31459266	6.00835e-06	5.22124	TEJ	T	C	71	4	5.33
Arkansas2007	id4010802	4	31512997	7.6932e-06	5.11389	TEJ	G	A	75	10	11.76
Arkansas2007	id4010817	4	31568339	2.68982e-05	4.57028	TEJ	A	G	75	10	11.76
Arkansas2007	id4010818	4	31569779	2.7751e-06	5.55672	TEJ	A	G	75	11	12.79
Arkansas2007	id4010894	4	31688182	1.36297e-05	4.86551	TEJ	T	C	73	12	14.12
Arkansas2007	id4010922	4	31719218	7.80377e-08	7.1077	TEJ	G	A	75	8	9.64
Arkansas2007	id4010926	4	31720415	3.34865e-06	5.47513	TEJ	T	C	75	11	12.79
Texas	id5006210	5	15144021	7.87007e-05	4.10402	TRJ	C	T	39	24	38.1
Qiyang	id6001399	6	1868504	5.48454e-06	5.26086	IND	A	G	18	1	5.26
Arkansas2007	id6002102	6	2747386	4.29732e-05	4.3668	IND	A	G	52	6	10.34
Arkansas2007	id6002118	6	2752401	5.87375e-05	4.23108	IND	G	A	55	6	9.84
Arkansas2007	id6002120	6	2752547	5.87375e-05	4.23108	IND	T	G	55	6	9.84
Arkansas2007	id6002818	6	3430848	5.81333e-05	4.23557	IND	A	G	41	3	6.82
Arkansas2007	id6002885	6	3598148	8.01785e-05	4.09594	IND	A	G	52	3	5.45
Texas	id6004033	6	6300683	2.63171e-05	4.57976	ALL	C	T	246	56	18.54
Arkansas2007	id6010662	6	20405336	5.21853e-05	4.28245	TEJ	A	T	67	10	12.99
Texas	id6014042	6	26035031	4.54118e-06	5.34283	ALL	A	G	168	102	37.78
Texas	id6014566	6	26356834	4.6596e-05	4.33165	ALL	C	G	160	103	39.16
Texas	id6014566	6	26356834	6.44967e-05	4.19046	TRJ	C	G	71	4	5.33
Arkansas2007	id6014819	6	26631929	2.05811e-05	4.68653	ALL	G	C	153	125	44.96
Arkansas2007	id6014819	6	26631929	3.63131e-05	4.43994	TRJ	G	C	68	11	13.92
Arkansas2007	id6014886	6	26664383	6.05103e-06	5.21817	TRJ	C	T	69	9	11.54
Arkansas2007	id6014975	6	26713898	4.45638e-06	5.35102	TRJ	G	C	71	9	11.25
Arkansas2006	id7000364	7	2033251	9.16041e-05	4.03809	ALL	G	A	164	107	39.48
Arkansas2006	id7000367	7	2064946	9.4555e-05	4.02432	ALL	G	A	164	106	39.26
Qiyang	id7000387	7	2134248	6.76723e-07	6.16959	IND	G	T	32	2	5.88
Arkansas2007	id7001030	7	6066856	1.36846e-06	5.86377	ALL	G	A	225	56	19.93
Arkansas2007	id7001030	7	6066856	4.8838e-09	8.31124	IND	G	A	56	5	8.2
Arkansas2007	id7001032	7	6068267	2.12752e-06	5.67213	ALL	T	C	222	55	19.86
Arkansas2007	id7001032	7	6068267	4.8838e-09	8.31124	IND	T	C	56	5	8.2
Arkansas2007	id7001042	7	6090274	1.07689e-05	4.96783	ALL	A	G	227	54	19.22
Arkansas2007	id7001042	7	6090274	2.57252e-06	5.58964	IND	A	G	55	6	9.84
Texas	id7002609	7	16257340	3.7543e-06	5.42547	AUS	T	C	51	3	5.56
Texas	id7002647	7	16447993	3.11671e-06	5.5063	AUS	C	T	52	3	5.45
Texas	id7002653	7	16449199	3.11671e-06	5.5063	AUS	A	T	52	3	5.45
Texas	wd7002311	7	16476208	8.56871e-06	5.06708	AUS	A	T	48	3	5.88
Texas	id7002666	7	16512007	9.17447e-06	5.03742	AUS	A	G	44	3	6.38
Texas	id7002675	7	16584177	4.04924e-06	5.39263	AUS	G	A	50	3	5.66
Texas	id7002688	7	16801939	3.11671e-06	5.5063	AUS	C	A	52	3	5.45
Texas	ud7001133	7	16868277	3.11671e-06	5.5063	AUS	T	C	52	3	5.45
Texas	id7002690	7	16868541	6.9587e-06	5.15747	AUS	C	T	49	3	5.77
Texas	id7002693	7	16892379	7.14764e-06	5.14584	AUS	G	T	48	3	5.88
Texas	id7002701	7	16896071	6.9587e-06	5.15747	AUS	A	T	49	3	5.77
Texas	ud7001148	7	17129267	8.59152e-05	4.06593	AUS	G	T	50	4	7.41
Arkansas2007	wd7002613	7	17903658	9.40784e-05	4.02651	AUS	C	T	46	7	13.21
Arkansas2007	ud7001237	7	17909840	2.9179e-05	4.53493	AUS	T	G	46	6	11.54
Arkansas2007	ud7001238	7	17956567	6.16249e-05	4.21024	AUS	T	G	45	7	13.46
Arkansas2007	wd7002626	7	17956597	9.40784e-05	4.02651	AUS	A	G	46	7	13.21
Faridpur	ud7001419	7	20127860	2.0085e-05	4.69713	TRJ	C	G	43	34	44.16
Faridpur	id7003179	7	20158958	6.06068e-05	4.21748	ALL	A	G	103	96	48.24
Faridpur	id7003179	7	20158958	5.17403e-06	5.28617	TRJ	A	G	37	30	44.78
Faridpur	id7003190	7	20220966	6.06316e-05	4.2173	TRJ	T	C	45	33	42.31
Faridpur	id7003192	7	20224867	6.06316e-05	4.2173	TRJ	C	T	45	33	42.31
Texas	id7005590	7	27906999	2.80559e-05	4.55198	IND	A	C	40	30	42.86
Texas	id7005593	7	27911759	9.30828e-05	4.03113	IND	C	T	38	32	45.71
Texas	id7005912	7	29055632	6.55987e-06	5.1831	ALL	G	C	196	105	34.88
Texas	id7005912	7	29055632	9.13853e-07	6.03912	AUS	G	C	50	5	9.09
Texas	id7005957	7	29160094	7.16801e-05	4.1446	ALL	T	C	195	103	34.56
Texas	id7005960	7	29163231	3.02247e-05	4.51964	ALL	A	T	197	102	34.11
Texas	id7005960	7	29163231	4.05851e-06	5.39163	AUS	A	T	51	3	5.56
Texas	id7005976	7	29178593	4.47903e-05	4.34882	ALL	C	T	194	100	34.01
Texas	id7005976	7	29178593	3.77887e-06	5.42264	AUS	C	T	51	3	5.56
Texas	id7005984	7	29185592	4.86286e-05	4.31311	ALL	G	A	193	103	34.8
Texas	id7005984	7	29185592	3.11671e-06	5.5063	AUS	G	A	52	3	5.45
Texas	id7005985	7	29185809	3.11949e-05	4.50592	ALL	T	C	198	103	34.22
Texas	id7005985	7	29185809	3.11671e-06	5.5063	AUS	T	C	52	3	5.45
Texas	id7005990	7	29187797	3.11949e-05	4.50592	ALL	T	G	198	103	34.22
Texas	id7005990	7	29187797	3.11671e-06	5.5063	AUS	T	G	52	3	5.45
Texas	id8000005	8	29078	1.12058e-05	4.95056	ALL	A	C	163	137	45.67
Texas	id8000007	8	31728	2.08059e-06	5.68181	ALL	A	G	276	26	8.61
Texas	id8000010	8	33534	2.90298e-06	5.53716	ALL	G	A	152	134	46.85
Texas	id8000014	8	36046	1.08559e-05	4.96433	ALL	C	T	163	138	45.85
Texas	id8000032	8	85005	6.19074e-06	5.20826	ALL	C	T	175	106	37.72
Texas	id8000037	8	92185	2.39265e-05	4.62112	ALL	A	C	160	129	44.64
Texas	id8000230	8	654757	6.28958e-06	5.20138	ALL	A	C	242	56	18.79
Texas	id8000424	8	1629290	4.6305e-05	4.33437	IND	A	G	50	20	28.57
Arkansas2007	id8002451	8	7879279	9.45971e-05	4.02412	IND	T	C	46	15	24.59
Texas	id8004475	8	16819504	5.63993e-06	5.24873	IND	C	T	40	7	14.89
Texas	id8004627	8	17555306	1.0401e-05	4.98293	IND	G	A	64	5	7.25
Texas	id8004653	8	17647761	3.93139e-05	4.40545	IND	C	A	64	4	5.88
Texas	id8004825	8	18171511	5.08289e-06	5.29389	IND	C	T	61	6	8.96
Qiyang	id8005315	8	19751682	6.12624e-05	4.21281	TEJ	C	G	34	27	44.26
Qiyang	id8005317	8	19753745	7.10981e-05	4.14814	TEJ	T	C	33	27	45
Qiyang	id8005319	8	19754387	6.12624e-05	4.21281	TEJ	C	A	34	27	44.26
Qiyang	id8005324	8	19755581	6.12624e-05	4.21281	TEJ	G	A	34	27	44.26
Qiyang	id8005329	8	19756328	7.10981e-05	4.14814	TEJ	G	A	33	27	45
Qiyang	id8005330	8	19756382	7.40245e-05	4.13062	TEJ	C	T	34	25	42.37
Qiyang	ud8001294	8	19756423	6.69746e-05	4.17409	TEJ	G	A	32	27	45.76
Qiyang	wd8003687	8	19758268	6.12624e-05	4.21281	TEJ	T	C	34	27	44.26
Qiyang	wd8003699	8	19796343	7.10981e-05	4.14814	TEJ	G	A	33	27	45
Arkansas2006	id8005589	8	20477488	2.372e-05	4.62489	IND	C	T	53	3	5.36
Arkansas2007	ud8001795	8	26867295	8.12581e-05	4.09013	AUS	T	C	34	19	35.85
Arkansas2006	id8007848	8	28005113	2.25817e-06	5.64624	IND	G	T	48	4	7.69
Arkansas2006	id8007858	8	28011991	8.38533e-06	5.07648	IND	A	T	52	4	7.14
Arkansas2007	id9005955	9	17656623	1.09413e-06	5.96093	IND	A	G	26	3	10.34
Arkansas2007	id10006799	10	21533655	6.82262e-05	4.16605	IND	G	A	57	3	5
Texas	id10006853	10	21664698	5.00145e-05	4.3009	AUS	G	T	35	7	16.67
Texas	id11001903	11	4784914	3.40643e-05	4.4677	TRJ	C	T	66	4	5.71
Arkansas2006	id11006870	11	18580605	1.42678e-05	4.84564	IND	A	G	48	3	5.88
Arkansas2007	id11008167	11	21436890	6.57479e-05	4.18212	ALL	G	A	158	80	33.61
Qiyang	dd11000272	11	21798820	3.19594e-05	4.4954	AUS	G	C	26	8	23.53
Texas	id11008700	11	22182562	7.53909e-05	4.12268	AUS	C	G	19	1	5
Faridpur	id11010482	11	26037486	1.24265e-05	4.90565	IND	G	A	20	2	9.09
Qiyang	id11010975	11	27126077	3.37394e-06	5.47186	TEJ	T	G	48	13	21.31
Qiyang	id11011460	11	28216224	7.12474e-05	4.14723	TEJ	A	C	51	10	16.39
Qiyang	id11011480	11	28236802	1.70418e-07	6.76848	TEJ	C	G	45	6	11.76
Faridpur	id11011524	11	28284657	7.96865e-05	4.09862	ALL	C	T	125	123	49.6
Texas	id12001273	12	3095691	3.85112e-06	5.41441	AUS	T	C	51	3	5.56
Texas	id12001275	12	3096474	5.21933e-06	5.28239	AUS	C	T	50	3	5.66
Texas	id12001317	12	3205546	3.11671e-06	5.5063	AUS	G	A	52	3	5.45
Texas	id12001321	12	3208511	3.11671e-06	5.5063	AUS	C	T	52	3	5.45
Texas	id12001356	12	3283577	6.25424e-06	5.20383	AUS	T	C	32	2	5.88
Texas	id12001383	12	3407416	3.11671e-06	5.5063	AUS	C	G	52	3	5.45
Texas	id12001403	12	3479224	9.82329e-06	5.00774	AUS	C	T	47	3	6
Texas	id12003968	12	10135256	9.55432e-06	5.0198	AUS	G	A	45	3	6.25
Faridpur	wd12001105	12	11042253	2.06598e-05	4.68487	IND	T	A	29	2	6.45
Qiyang	id12005174	12	14288968	2.35549e-09	8.62792	IND	A	G	18	1	5.26
Texas	id12005280	12	14829985	7.99366e-05	4.09725	IND	A	C	38	4	9.52
Qiyang	id12006497	12	19400216	2.25499e-05	4.64686	IND	C	T	36	2	5.26
Arkansas2006	id12008450	12	23902850	4.61731e-05	4.33561	ALL	G	A	160	107	40.07
Faridpur	id12009197	12	25492331	2.84171e-05	4.54642	ALL	A	G	222	29	11.55
